# Supplementary material for: Single Zn atoms anchored in mesoporous N-doped carbon rods derived from metal–organic frameworks for enhanced electrocatalytic oxygen reduction reaction
Source: Royal Society of Chemistry journal article supplement (doi:10.1039/d4ta09167a), 2025-01-01
Supplement: d4ta09167a1.pdf [file d4ta09167a1.pdf]

Supplementary Information (SI) for Journal of Materials Chemistry A

**Single Zn Atoms Anchored in Mesoporous N-Doped Carbon Rods Derived from Metal-Organic Frameworks for Enhanced Electrocatalytic Oxygen Reduction Reaction**

*Mengxue Ma<sup>†a</sup>, Zhuoya Pei<sup>†a</sup>, Yuxin Peng<sup>a</sup>, Rong Hua<sup>a</sup>, Yuxing Ma<sup>a</sup>, Weilong Wang<sup>b</sup>, Xiaoxiang Xu<sup>b\*</sup>, Xuepeng Zhang<sup>a</sup>, Haoquan Zheng<sup>a, c\*</sup>*

<sup>a</sup>Key Laboratory of Applied Surface and Colloid Chemistry, Ministry of Education, School of Chemistry and Chemical Engineering, Shaanxi Normal University, Xi'an 710119, China.

<sup>b</sup>Department of Otorhinolaryngology-Head and Neck Surgery, Zhongnan Hospital of Wuhan University, Wuhan, 430071, China.

<sup>c</sup>Shanghai Key Laboratory of High-resolution Electron Microscopy, ShanghaiTech University, Shanghai 201210, China

Correspondence Email: [zhenghaoquan@snnu.edu.cn](mailto:zhenghaoquan@snnu.edu.cn); [zn003504@whu.edu.cn](mailto:zn003504@whu.edu.cn)

<sup>†</sup>These authors contributed equally to this work.

## 1. Materials characterization

Scanning electron microscopy (SEM) images were recorded on a Hitachi SU8020 microscope. Transmission electron microscopy (TEM) measurements were performed by a JEOL JEM-7900F, the acceleration voltage is 200 kV. And energy dispersive X-ray spectroscopy (EDS) was used to observe the microstructure and the uniform dispersion of C, N, O, Zn in the catalyst. Aberration correction high-angle dark-filed scanning transmission electron microscope (AC HAADF-STEM) images were conducted on a Themis G2 300 microscope operated at 300 kV. Powder X-ray diffraction (PXRD) patterns were used to Bruker D8 Advance. Raman spectroscopy was performed on a HORIBA LabRAM Odyssey Raman spectrometer system (532 nm laser). X-ray photoelectron spectroscopy (XPS) spectra were recorded on Kratos Analytical Ltd AXIS ULTRA. N<sub>2</sub> adsorption-desorption isotherm and Brunauer-Emmett-Teller (BET) surface area with a Micromeritics/ASAP 2460 instrument to detect. Zn K-edge X-ray absorption spectra (XAS) were collected by easyXAFS300 + (easyXAFs company).

## 2. Electrochemical measurements for ORR

All electrochemical performance evaluations were carried out on the CHI 760E electrochemical workstation, utilizing a setup with three-electrode in a 0.1 M KOH solution. The carbon rod served as the counter electrode, while the Ag/AgCl electrode was used as the reference electrode. The working electrode was either a rotating disk electrode (RDE) (5 mm, 0.196 cm<sup>2</sup>) or a rotating ring-disk electrode (RRDE) (5.61 mm, 0.247 cm<sup>2</sup>), both coated with catalyst slurry. Among the ink of catalyst included 2 mg of the sample, 333 μL of water, 166 μL of ethanol, and 10 μL of 5 % Nafion solution, and was ultrasonicated for 30 min to obtain a homogeneous solution. The above ink was transferred 20 μL by using a pipette in twice, dropped onto the electrode surface, and dried naturally at room temperature, the total load of catalyst was 0.4 mg cm<sup>-2</sup>. Before testing, introducing Ar or O<sub>2</sub> into the 0.1 M KOH solution for 30 min to eliminate dissolved oxygen in the electrolyte. Cyclic voltammetry (CV) measurements

were operated in Ar- or O<sub>2</sub>-saturated with a scan rate of 50 mV s<sup>-1</sup>. Linear sweep voltammetry (LSV) measurements were performed with a scan rate of 5 mV s<sup>-1</sup> under different rotating speeds of 400 - 2025 rpm after 100 % IR compensation. The potentials of this experiment refer to reversible hydrogen electrode (RHE),  $E_{\text{RHE}} = E_{\text{Ag/AgCl}} + 0.059 \text{ pH} + 0.197$ . The electron transfer number ( $n$ ) was determined by RDE measurements by Koutecký-Levich ( $K-L$ ) equation:

$$\frac{1}{j} = \frac{1}{j_1} + \frac{1}{j_k} = \frac{1}{B\omega^{1/2}} + \frac{1}{j_k}$$

$$B = 0.2nFC_0(D_0)^{2/3}\nu^{-1/6}$$

Where  $j, j_1, j_k$  represent the experimentally measured, diffusion limiting and kinetic current density, respectively.  $\Omega$  is the rotation speed (rotations per minute, rpm),  $n$  is the electron transfer number,  $F$  is the Faraday constant (96485 C mol<sup>-1</sup>),  $C_0$  is the bulk concentration of O<sub>2</sub> in 0.1 M KOH ( $1.2 \times 10^{-3}$  M),  $D_0$  is the diffusion coefficient of O<sub>2</sub> in 0.1 M KOH ( $1.9 \times 10^{-5}$  cm<sup>2</sup> s<sup>-1</sup>), and  $\nu$  is the kinematic viscosity (0.01 cm<sup>2</sup> s<sup>-1</sup>). The  $n$  and hydrogen peroxide yield (H<sub>2</sub>O<sub>2</sub> %) also can be calculated by RRDE measurements by the following equations:

$$n = \frac{4 I_d}{I_d + \frac{I_r}{N}}$$

$$\text{H}_2\text{O}_2 \% = \frac{200 \frac{I_r}{N}}{I_d + \frac{I_r}{N}}$$

Where  $I_d$  and  $I_r$  are disk and ring current density, respectively.  $N$  is the collection efficiency of Pt ring (0.37).

The electrochemically active surface area (ECSA) was measured by CV at different scan rates of 20 – 100 mV s<sup>-1</sup> in a non-Faradaic potential (1.07 – 1.17 V). The ECSA was calculated by following equation:

$$\text{ECSA} = C_{\text{dl}}/C_s$$

Where  $C_{\text{dl}}$  is double-layer capacitance by measured,  $C_s$  is the specific capacitance (0.03 mF cm<sup>-2</sup>).

### 3. Zn-air battery measurements

All electrochemical performance tests of batteries were conducted on the CHI 660E electrochemical workstation. A polished round zinc plate serves as the anode of a Zn-air battery (thickness 0.25 mm, diameter 15 mm). And the gas diffusion layer (thickness 0.2 mm,  $1.8 \times 1.8$  cm<sup>2</sup>) and the loaded catalyst layer (thickness 0.2 mm,  $1.5 \times 1.5$  cm<sup>2</sup>) together form the cathode of the battery. The catalyst ink was prepared as follows: 2.5 mg of catalyst and 2.5 mg of RuO<sub>2</sub> were dispersed in 910  $\mu$ L of ethanol, 50  $\mu$ L of water, and 40  $\mu$ L of Nafion (5 wt%), dissolved by ultrasound for 30 minutes, and 500  $\mu$ L of the ink was dropped onto the surface of the loaded catalyst layer, with a catalyst loading of 2 mg cm<sup>-2</sup>. The electrolyte was composed of a mixture of 6 M KOH and 0.2 M Zn(NO<sub>3</sub>)<sub>2</sub>·6H<sub>2</sub>O. The rate capacities were evaluated by galvanostatic discharge at various current density of 2, 5, 10, 20 and 50 mA cm<sup>-2</sup> and back to 2 mA cm<sup>-2</sup>. And the cycle time of each battery was 10 min during long-term charge-discharge cycle test.

### 4. Computational details

All density functional theory (DFT) periodic calculations were conducted using the Vienna Ab-initio Package (VASP).<sup>1, 2</sup> The functional proposed by Perdew, Burke, and Ernzerhof (PBE) was utilized for these calculations. Interactions were modeled using the projector augmented wave (PAW) potential, while the Kohn-Sham one-electron valence states were expanded in a plane wave basis with a cutoff energy set at 500 eV.<sup>3-</sup>

5

Regarding the balance between structural modeling accuracy and computation cost, we have constructed the model based on either pristine Zn-MCRs or NC surface. The vacuum thickness is set to the value greater than 15 Å to ensure sufficient separation between the two opposite surface effect. To optimize computational

efficiency, the Monkhorst-Pack reciprocal space integration was carried out using Gamma-centered k-points with a grid of  $3 \times 3 \times 1$ . The Hellmann-Feynman forces were deemed converged when was set as smaller than  $0.03 \text{ eV/\AA}$ . The electronic energy was considered self-consistent if the energy change was less than  $10^{-5} \text{ eV}$  and the convergence criterion for frequency calculation is that the energy is less than  $10^{-6} \text{ eV}$ .

In this study, the Gibbs free energy was also calculated. The zero-point energy (ZPE) correction was applied using methods previously reported in the literature. During the DFT process, we determined the Gibbs free energy using the following equations:

$$G^0 = E_{\text{DFT}} + \text{ZPE} - TS^0$$

Where  $G^0$  is the Gibbs free energy,  $E_{\text{DFT}}$  is total free energy, ZPE is the vibration energy;  $TS^0$  is the entropy change ( $T = 298.15 \text{ K}$ ). The ORR process proceeds via the following pathway:

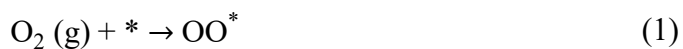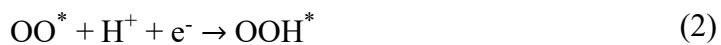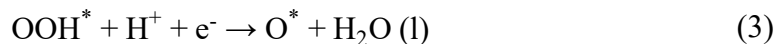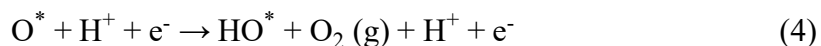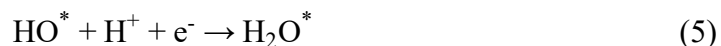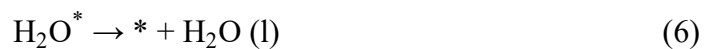

The Standard Hydrogen electrode (SHE) model was used to calculate the change of each elementary step ( $\text{OO}^*$ ,  $\text{OOH}^*$ ,  $\text{O}^*$ ,  $\text{HO}^*$ ,  $\text{H}_2\text{O}^*$ ,  $*$ ) in Gibbs free energy. The chemical potential of proton-electron pair is equal to one half of  $\text{H}_2$ .<sup>6</sup>

**Table S1.** ICP-OES of the metal contents of the samples

| <b>Sample</b> | <b>Zn (wt %)</b> |
|---------------|------------------|
| Zn-MCRs       | 6.6              |
| Zn-CRs        | 7.2              |
| MCRs          | 0.47             |
| NC            | 5.0              |

The Zn content in both Zn-CRs and Zn-MCRs is higher than that in NC, demonstrating that the introduction of the PDA composite monomicelles layer effectively captures a portion of the Zn and successfully anchors it onto the surface of the ZIF-R.

**Table S2.** BET surface area of the samples

|                    | Zn-MCRs ( $\text{m}^2 \text{g}^{-1}$ ) | NC ( $\text{m}^2 \text{g}^{-1}$ ) |
|--------------------|----------------------------------------|-----------------------------------|
| $S_{\text{BET}}$   | 616.8                                  | 543.6                             |
| $S_{\text{micro}}$ | 470.0                                  | 462.2                             |
| $S_{\text{meso}}$  | 146.8                                  | 81.4                              |

Zn-MCRs exhibit a higher specific surface area and possess more mesoporous sections ( $146.8 \text{ m}^2 \text{g}^{-1}$ ) compared to NC ( $81.4 \text{ m}^2 \text{g}^{-1}$ ), thereby proving the successful introduction of monomicelles.

**Table S3.** EXAFS fitting parameters at the Zn K-edge for various samples

| <b>samples</b> | <b>path</b> | <b>CN</b>     | <b>R (Å)</b> | <b><math>\sigma^2</math> (Å<sup>2</sup>)</b> | <b><math>\Delta E_0</math> (eV)</b> | <b>R factor</b> |
|----------------|-------------|---------------|--------------|----------------------------------------------|-------------------------------------|-----------------|
| Zn foil        | Zn-Zn1      | 6             | 2.65         | $0.0118 \pm 0.0020$                          | $1.50 \pm 1.59$                     | 0.0032          |
|                | Zn-Zn2      | 6             | 2.80         | $0.0243 \pm 0.0074$                          |                                     |                 |
| ZnO            | Zn-O        | $3.8 \pm 0.9$ | 1.96         | $0.0045 \pm 0.0038$                          | $2.79 \pm 3.04$                     | 0.0053          |
| Zn-MCRs        | Zn-N        | $3.9 \pm 0.6$ | 2.00         | $0.0153 \pm 0.0023$                          | $-1.15 \pm 1.45$                    | 0.0160          |

CN, coordination number; R, distance between absorber and backscatter atoms;  $\sigma^2$ , Debye-Waller factor to account for both thermal and structural disorders;  $\Delta E_0$ , inner potential correction; R factor indicates the goodness of fit.



**Table S4.** Performance comparison of Zn-based electrocatalysts for ORR catalysts in alkaline

| <b>Catalyst</b>      | <b><math>E_{1/2}</math> (vs RHE) (mV)</b> | <b>Reference</b>                                            |
|----------------------|-------------------------------------------|-------------------------------------------------------------|
| <b>Zn-MCRs</b>       | <b>873</b>                                | <b>This work</b>                                            |
| Zn-SAs/UNCNS         | 910                                       | <i>Chem Catalysis</i> 2022, <b>2</b> , 836-852              |
| S-Zn-N-C-950         | 890                                       | <i>Adv. Funct. Mater.</i> 2024, <b>34</b> , 2311337         |
| Zn-B/N-C             | 886                                       | <i>Angew. Chem. Int. Ed.</i> 2021, <b>60</b> , 181-185      |
| Zn-N <sub>4</sub> -O | 884                                       | <i>Adv. Sci.</i> 2023, <b>10</b> , 2302152                  |
| ZnNC                 | 880                                       | <i>Angew. Chem. Int. Ed.</i> 2023, <b>62</b> , e202216041   |
| ZnNC                 | 880                                       | <i>Angew. Chem.</i> 2023, <b>135</b> , e202216041           |
| Zn-N-C               | 873                                       | <i>Angew. Chem. Int. Ed.</i> 2019, <b>58</b> , 7035         |
| Zn-NC/GD             | 860                                       | <i>Carbon</i> 2022, <b>186</b> , 589-598                    |
| Zn-N-C               | 860                                       | <i>Chin. Chem. Lett.</i> 2020, <b>31</b> 1207-1212          |
| ZnNC                 | 857                                       | <i>Nat. Commun.</i> 2019, <b>10</b> , 2623                  |
| Zn-N-C-2             | 850                                       | <i>J. Colloid Interface Sci.</i> 2023, <b>650</b> , 934-942 |
| Zn/NC-2              | 845                                       | <i>Inorg. Chem.</i> 2023, <b>62</b> , 16547-16553           |
| ZnN <sub>x</sub> /BP | 593                                       | <i>Adv. Funct. Mater.</i> 2017, <b>27</b> , 1700802         |

**Table S5.** The Gibbs free energy change of the reaction in step 4 ( $\Delta G_4$ ) of the NC material occurring at the  $\alpha$ -C and  $\beta$ -C sites

| (eV)             | $\Delta G_4$ |
|------------------|--------------|
| NC-C $_{\alpha}$ | -1.26        |
| NC-C $_{\beta}$  | -1.21        |

**Table S6.** The Gibbs free energy change of the reaction in step 1 ( $\Delta G_1$ ) of the Zn-MCRs material occurring at the  $\alpha$ -C and  $\beta$ -C sites

| (eV)                  | $\Delta G_1$ |
|-----------------------|--------------|
| Zn-MCRs-C $_{\alpha}$ | 0.84         |
| Zn-MCRs-C $_{\beta}$  | 1.49         |

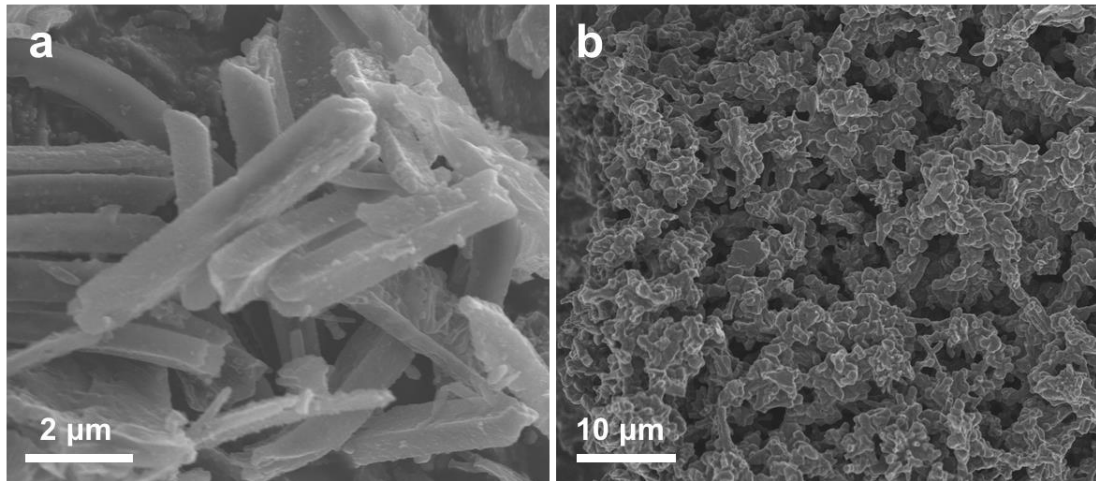

**Fig. S1.** SEM images of Zn-CR (a), and NC (b).

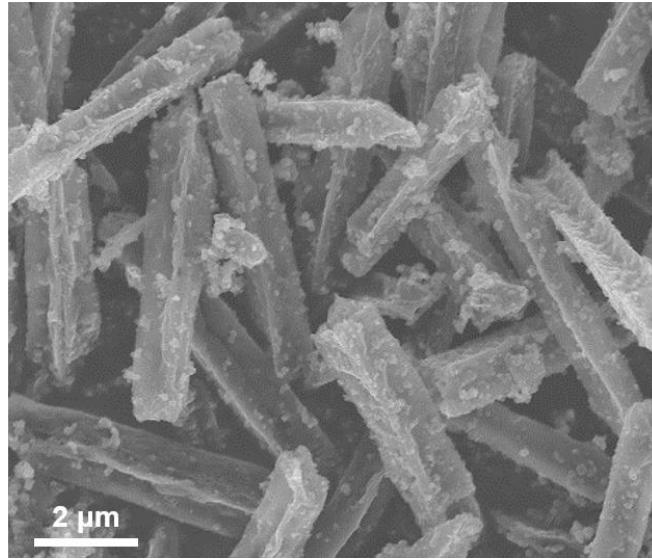

**Fig. S2.** SEM image of Zn-MCR.

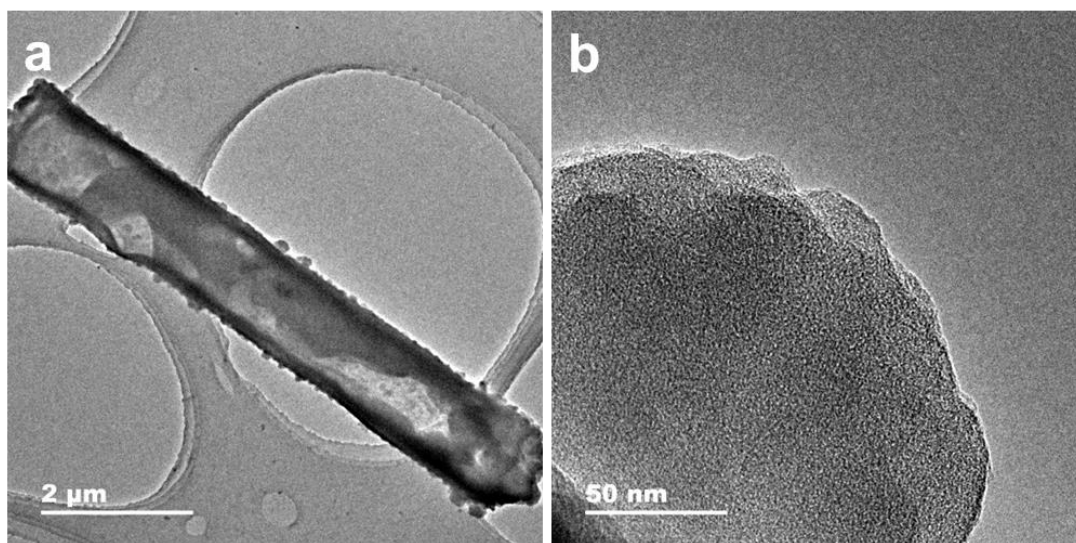

**Fig. S3.** TEM images of Zn-CR.

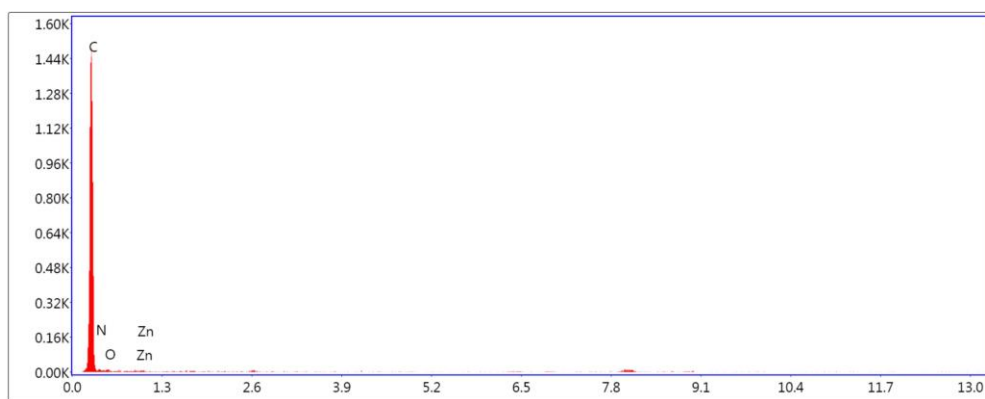

Lsec: 2.40 Cnts 0.000 keV Det: Apollo XLT2 SUTW Det

**Fig. S4.** EDS spectrum of MCR.

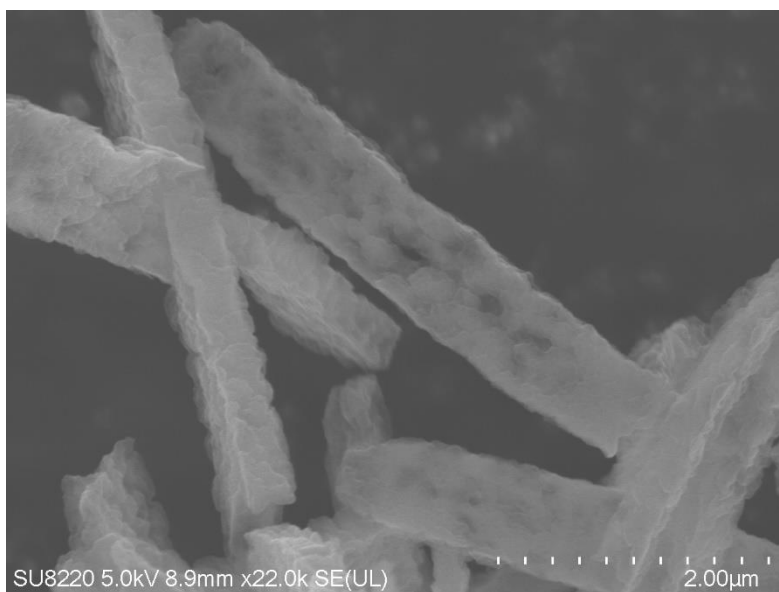

**Fig. S5.** SEM image of MCR.



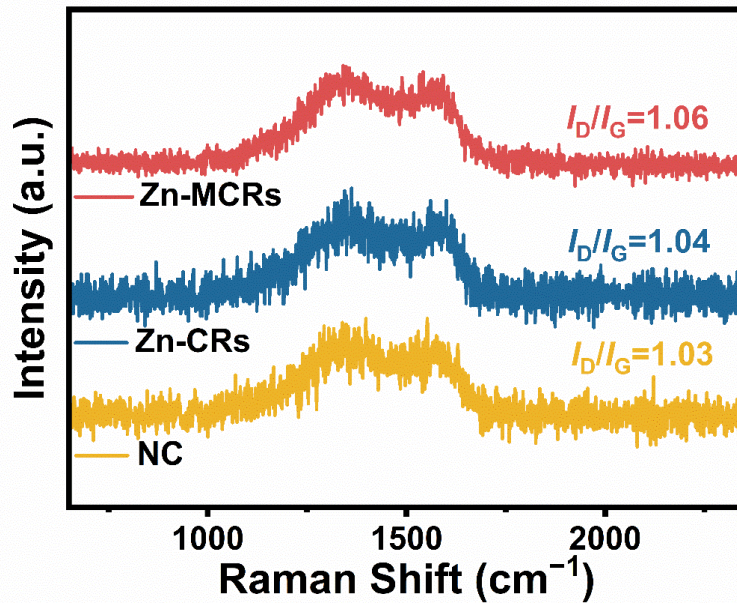

**Fig. S6.** Raman spectra of Zn-MCR, Zn-CR, and NC.

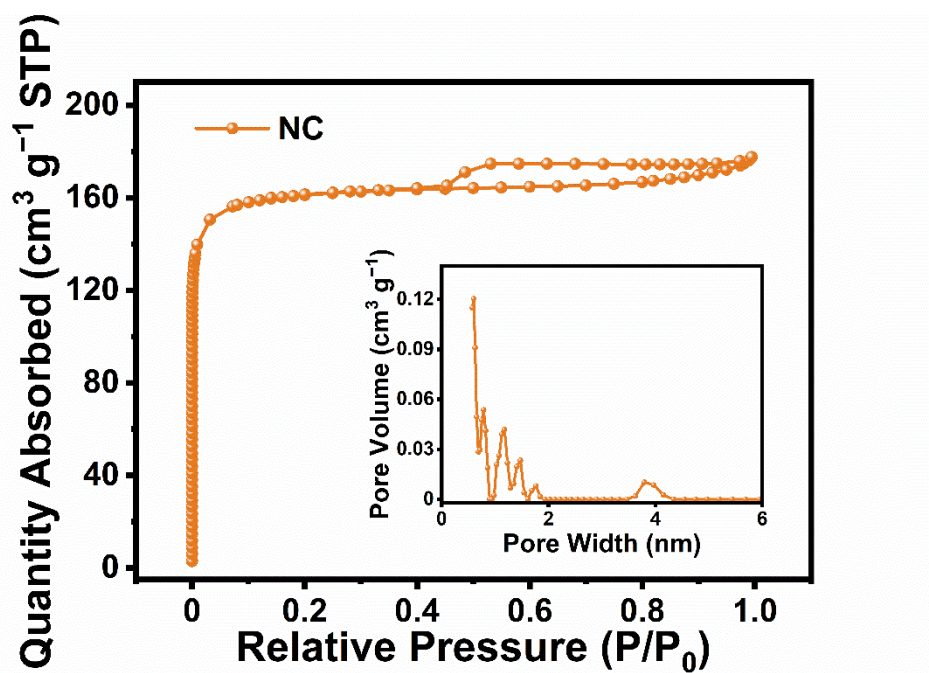

**Fig. S7.** N<sub>2</sub> adsorption-desorption isotherms, and corresponding pore size distribution curves of NC.

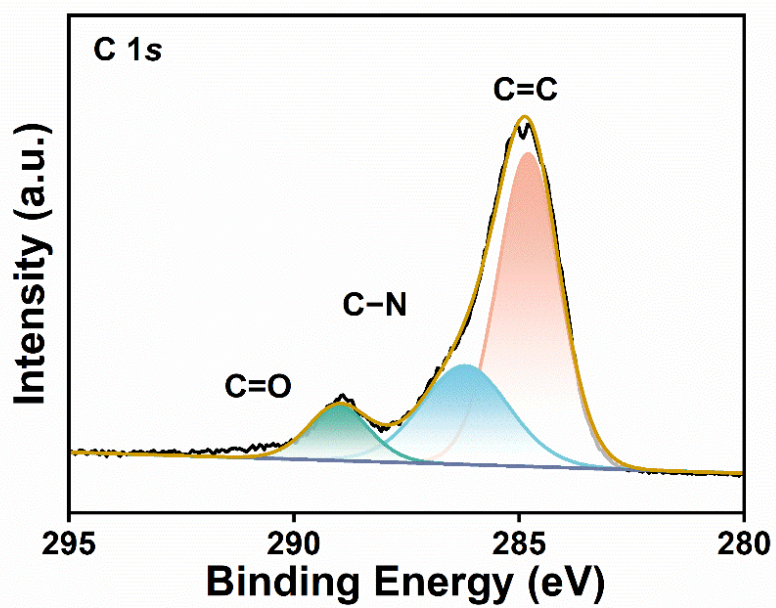

Fig. S8. High-resolution C1s XPS spectra of Zn-MCRs.

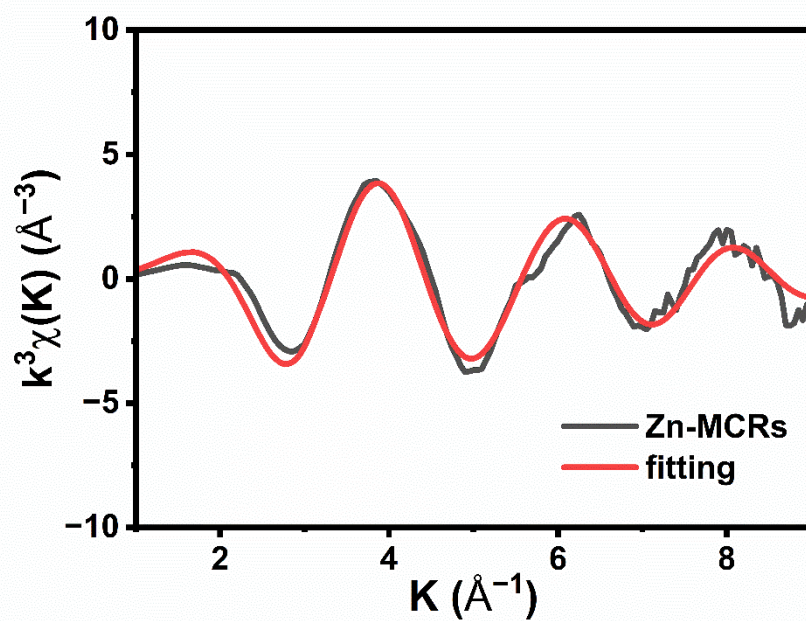

Fig. S9. Zn K-edge  $k^3$ -weighted EXAFS fitting curves of Zn-MCRs at K-space.

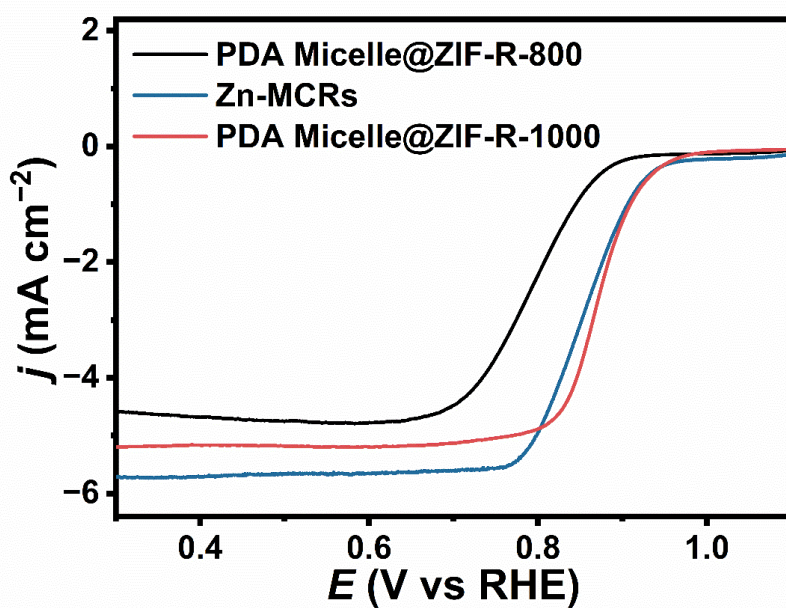

**Fig. S10.** LSV curves of Zn-MCRs at different pyrolysis temperatures of 800 °C, 900 °C, and 1000°C.

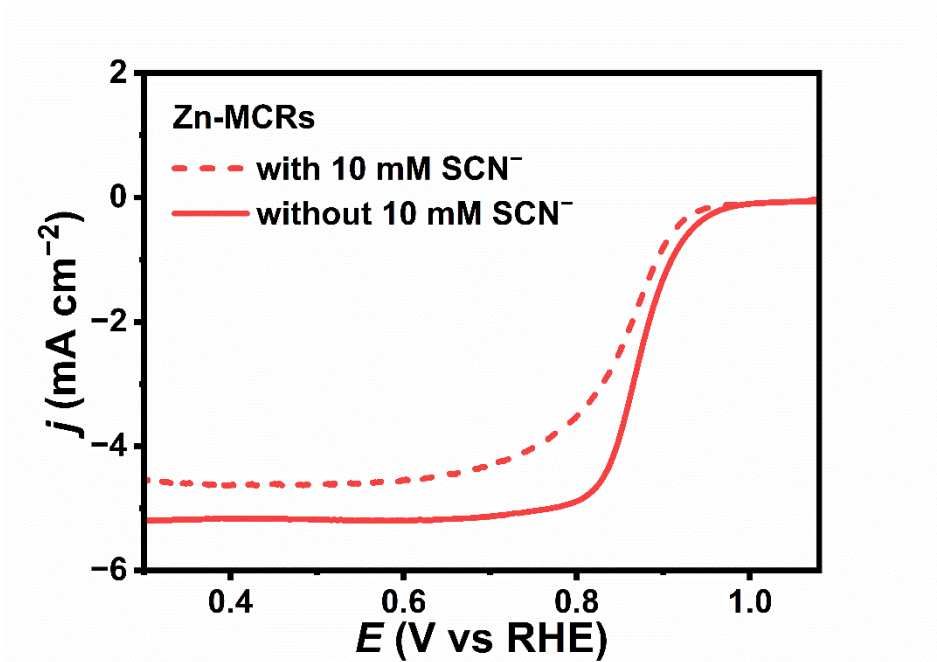

**Fig. S11.** LSV polarization curves of Zn-MCRs catalysts in O<sub>2</sub>-saturated KOH before and after adding KSCN solution.

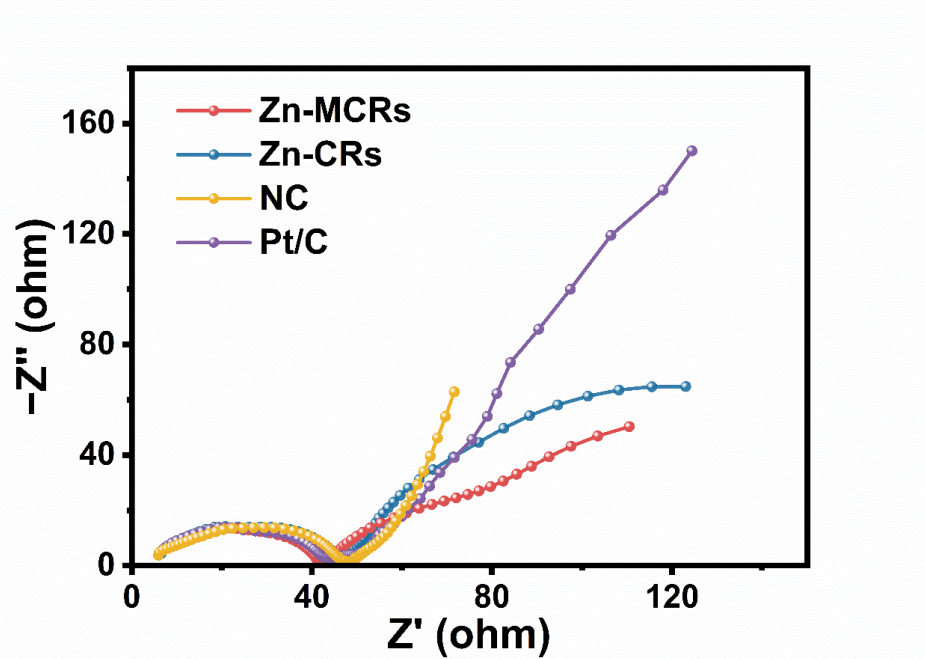

Fig. S12. EIS plots of Zn-MCRs in 0.1 M KOH.

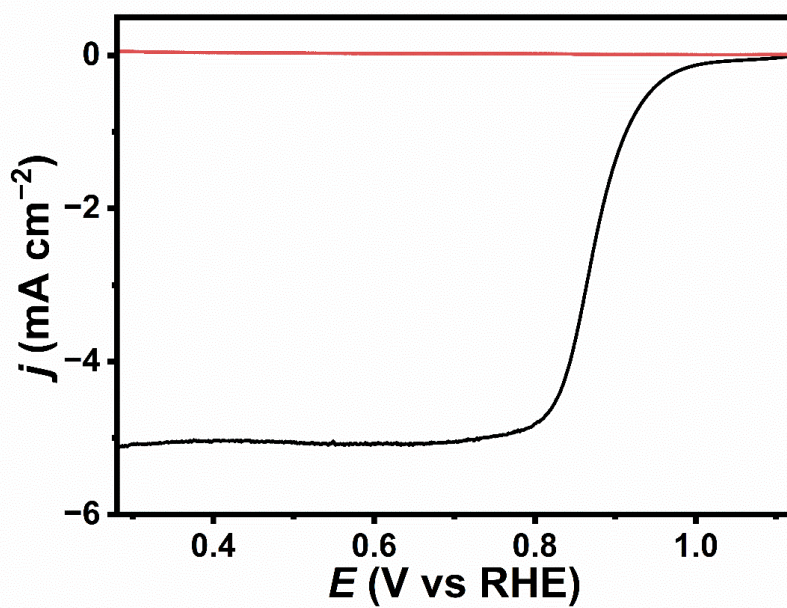

**Fig. S13.** LSV curves of Zn-MCRs by RRDE measurements.



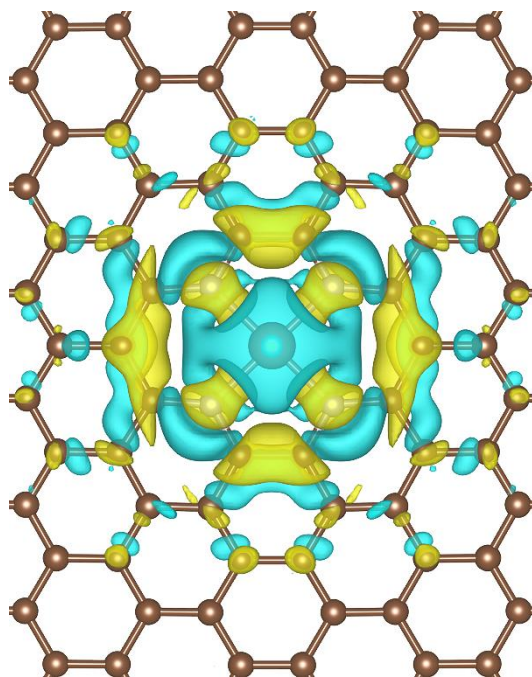

**Fig. S14.** The charge difference density diagram of Zn-MCRs. (isosurface level: 0.001 e Bohr<sup>-3</sup>).

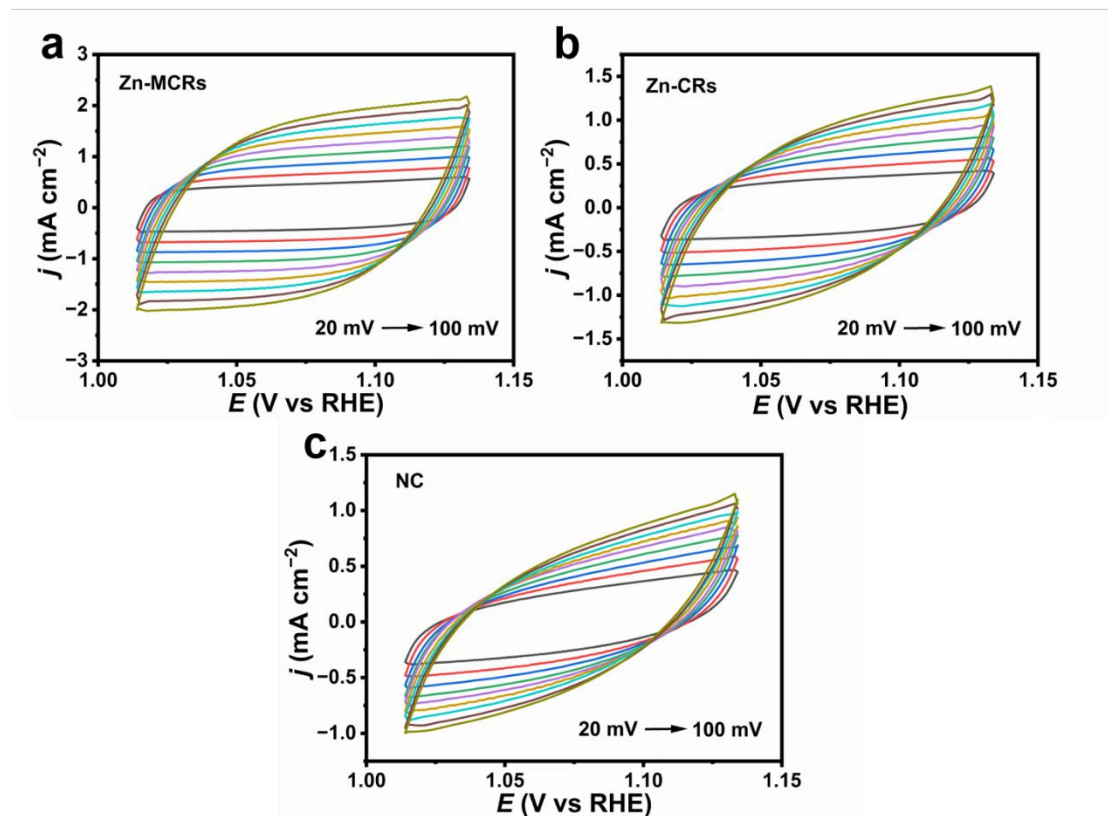

**Fig. S15.** CV curves at different scan rates of (a) Zn-MCRs, (b) Zn-CRs, and (c) NC in 0.1 M KOH.

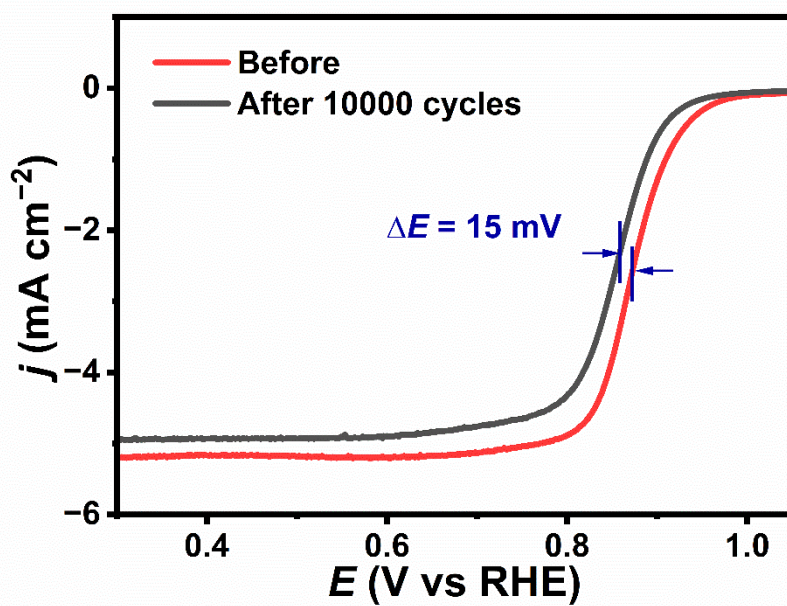

Fig. S16. ORR polarization curves before and after 10000 CV cycles of Zn-MCRs.

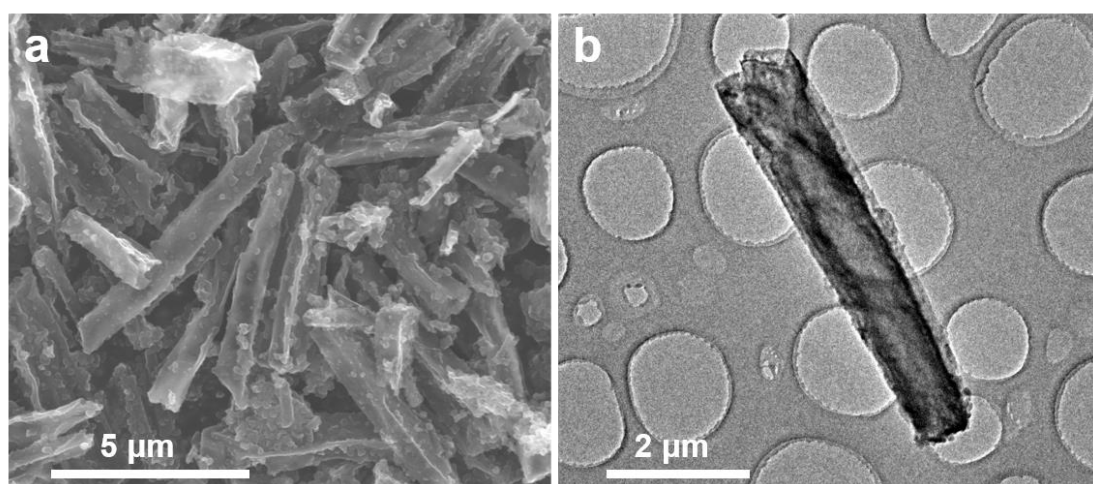

**Fig. S17.** SEM image (a) and TEM image (b) of Zn-MCRs after ORR.

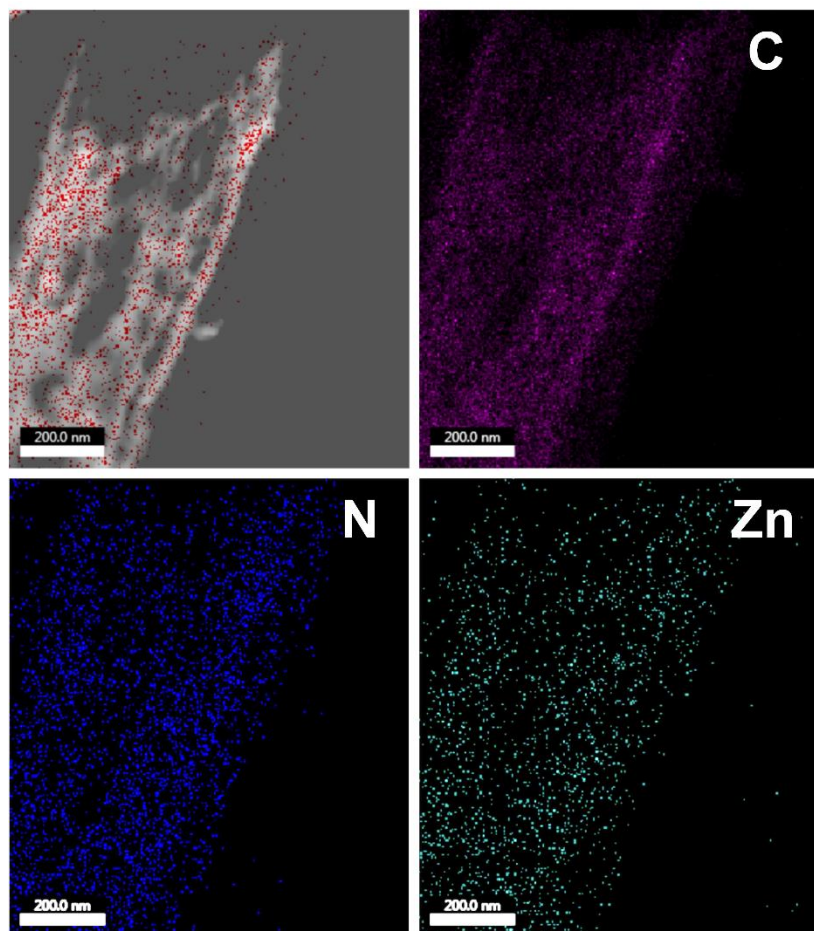

**Fig. S18.** EDS-mapping of Zn-MCRs after ORR.

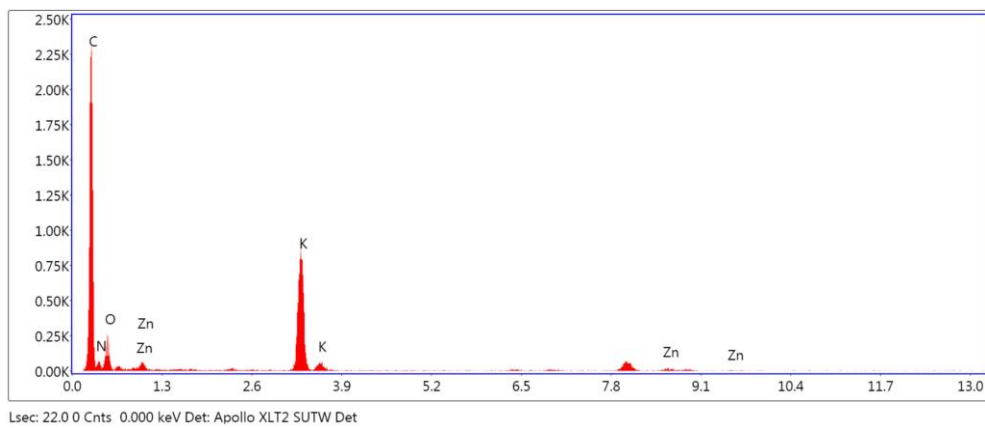

**Fig. S19.** EDS spectrum of Zn-MCRs after ORR.

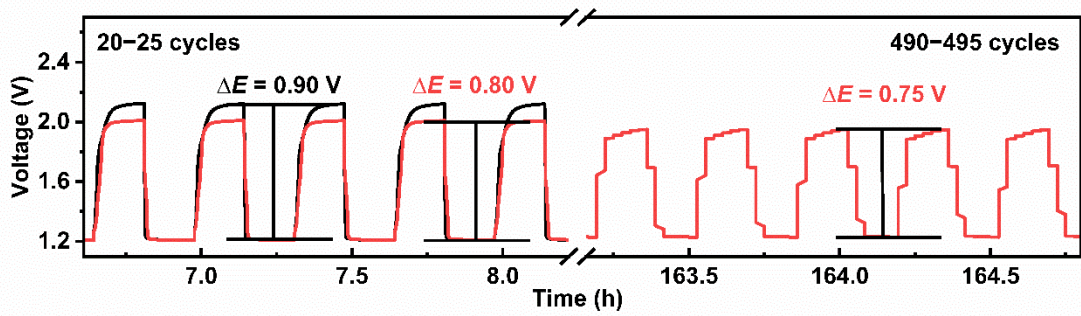

**Fig. S20** Charge-discharge voltage difference at different times of ZABs assembled with Zn-MCRs + RuO<sub>2</sub> and Pt/C + RuO<sub>2</sub>.

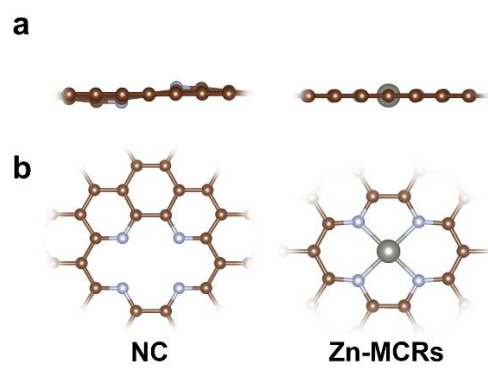

**Fig. S21.** (a) Side view and (b) top view of the optimized models of NC material and Zn-MCRs material.



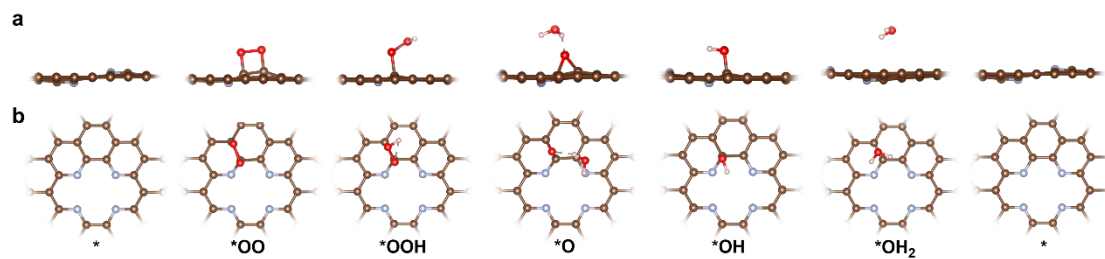

**Fig. S22.** (a) Side view and (b) top view of the optimized structures of each ORR intermediate at the C site on the NC material.

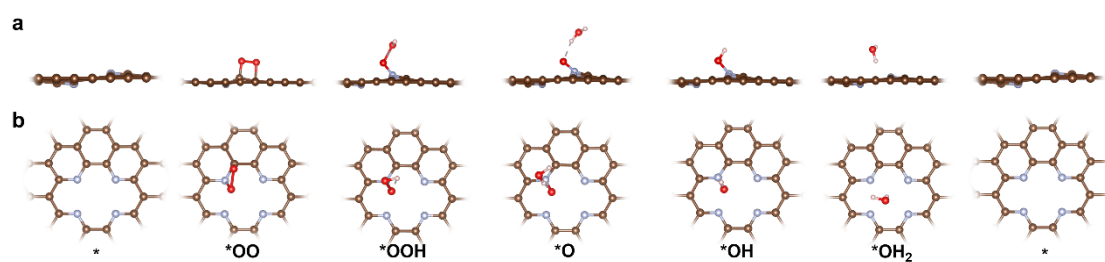

**Fig. S23.** (a) Side view and (b) top view of the optimized structures of each ORR intermediate at the N site on the NC material.

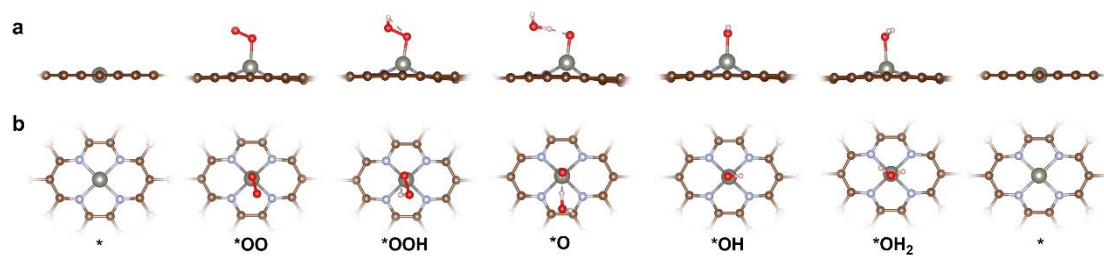

**Fig. S24.** (a) Side view and (b) top view of the optimized structures of each ORR

intermediate at the Zn site on the Zn-MCRs material.

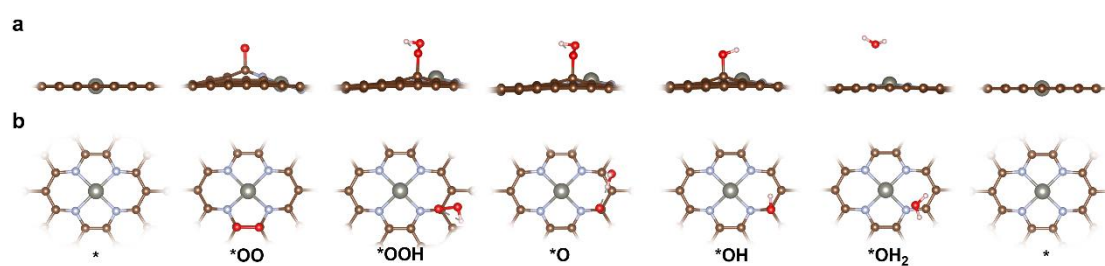

**Fig. S25.** (a) Side view and (b) top view of the optimized structures of each ORR

intermediate at the C site on the Zn-MCRs material.

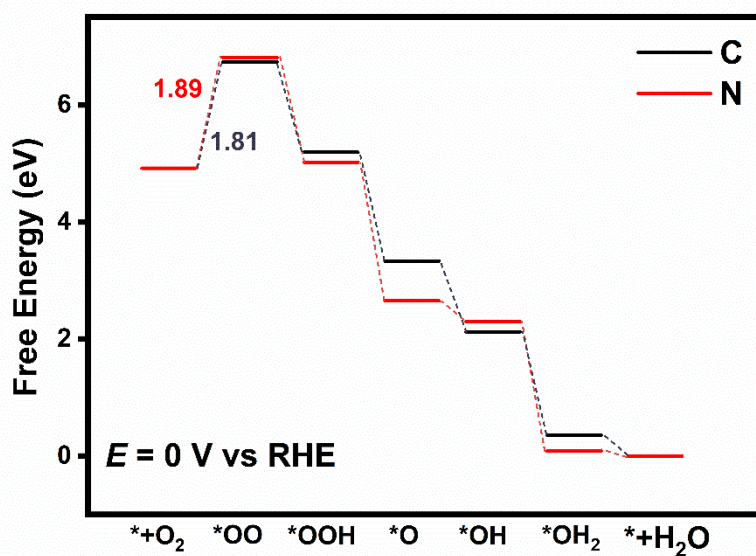

**Fig. S26.** The simulated energy barrier diagram at the N and C sites of the NC model at  $U = 0$  V.

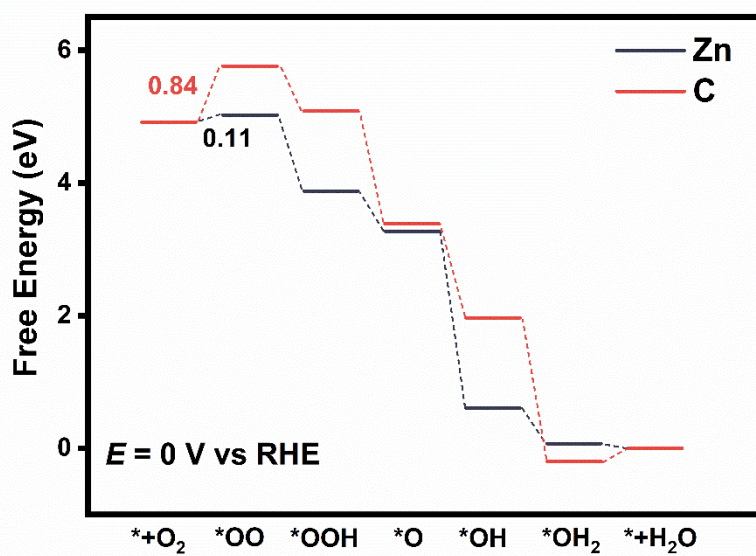

**Fig. S27.** The simulated energy barrier diagram at the Zn and C sites of the Zn-MCRs model at  $U = 0$  V.

## References

- 1 G. Kresse and J. Furthmüller. *Comput. Mater. Sci.*, 1996, **6**, 15-50.
- 2 G. Kresse and J. Furthmüller. *Phys. Rev. B*, 1996, **54**, 11169-11186.
- 3 J. P. Perdew, K. Burke and M. Ernzerhof. *Phys. Rev. Lett.*, 1996, **77**, 3865-3868.
- 4 G. Kresse and D. Joubert. *Phys. Rev. B*, 1999, **59**, 1758-1775.
- 5 M. Engel, M. Marsman, C. Franchini and G. Kresse. *Phys. Rev. B*, 2020, **101**, 184302.
- 6 J. K. Nørskov, J. Rossmeisl, A. Logadottir, L. Lindqvist, J. R. Kitchin, T. Bligaard and H. Jónsson. *J. Phys. Chem. B*, 2004, **108**, 17886-17892.
